# Supplementary material for: Convergence of microbial assimilations of soil carbon, nitrogen, phosphorus, and sulfur in terrestrial ecosystems
Source: PubMed Central journal article supplement (PMC4661723; doi:10.1038/srep17445), 2015-11-27
Supplement: srep17445-s1.pdf [file srep17445-s1.pdf]

1 Supplementary online material

2 for

3  
4 **Convergence of microbial assimilations of soil carbon, nitrogen,**  
5 **phosphorus, and sulfur in terrestrial ecosystems**

6  
7 Xiaofeng Xu<sup>1,2,3</sup>, Dafeng Hui<sup>4</sup>, Anthony W. King<sup>2</sup>, Xia Song<sup>1,2</sup>, Peter E. Thornton<sup>2</sup>, Lihua  
8 Zhang<sup>5</sup>

9  
10  
11 1. Department of Biological Sciences, University of Texas at El Paso, El Paso, TX, 79902, USA;  
12 2. Climate Change Science Institute and Environmental Science Division, Oak Ridge National  
13 Laboratory, Oak Ridge, TN 37831, USA; 3. Biology Department, San Diego State University,  
14 San Diego, CA 92182, USA; 4. Department of Biological Sciences, Tennessee State University,  
15 Nashville, TN 37209, USA; 5. State Key Laboratory of Vegetation and Environmental Change,  
16 Institute of Botany, Chinese Academy of Sciences, Beijing 100093, China

17  
18 Correspondence: X.X. ([xxu@mail.sdsu.edu](mailto:xxu@mail.sdsu.edu)); L.Z. ([zhanglihua788403@126.com](mailto:zhanglihua788403@126.com))

19  
20  
21  
22  
23  
24  
25  
26  
27  
28 This file contains Figure S1 and S2.  
29

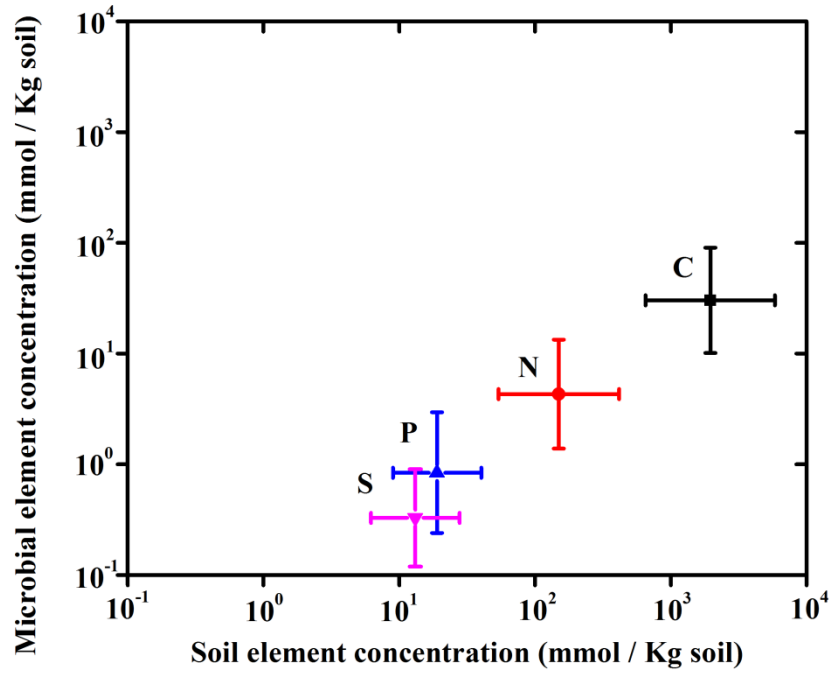

30

31

32

Figure S1 Scatterplot showing globally summarized C, N, P, and S in soil nutrients vs. soil microbial biomass

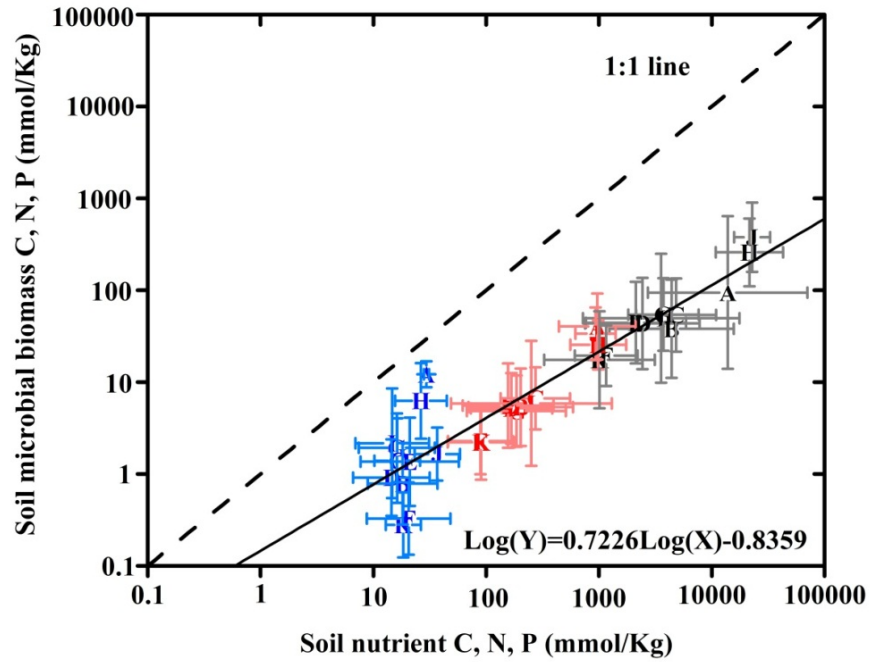

33

34 Figure S2. Scatterplot showing average and standard deviation of C, N, and P in soil nutrients  
 35 and soil microbial biomass at biome level (S is not included in this figure due to lack of data for  
 36 some biomes; blue triangles represent P, red circles represent N, black rectangles represent C; A:  
 37 boreal forest; B: temperate coniferous forest; C: temperate broadleaf forest; D:  
 38 tropical/subtropical forest; E: grassland; F: cropland; G: pasture; H: nature wetlands; I: shrub; J:  
 39 tundra; K: desert/bare soils)
